# Supplementary material for: Improving the success of reinforcement programs: effects of a two-week confinement in a field enclosure on the anti-predator behaviour of captive-bred European hamsters
Source: PeerJ journal article supplement (doi:10.7717/peerj.15812), 2023-09-01

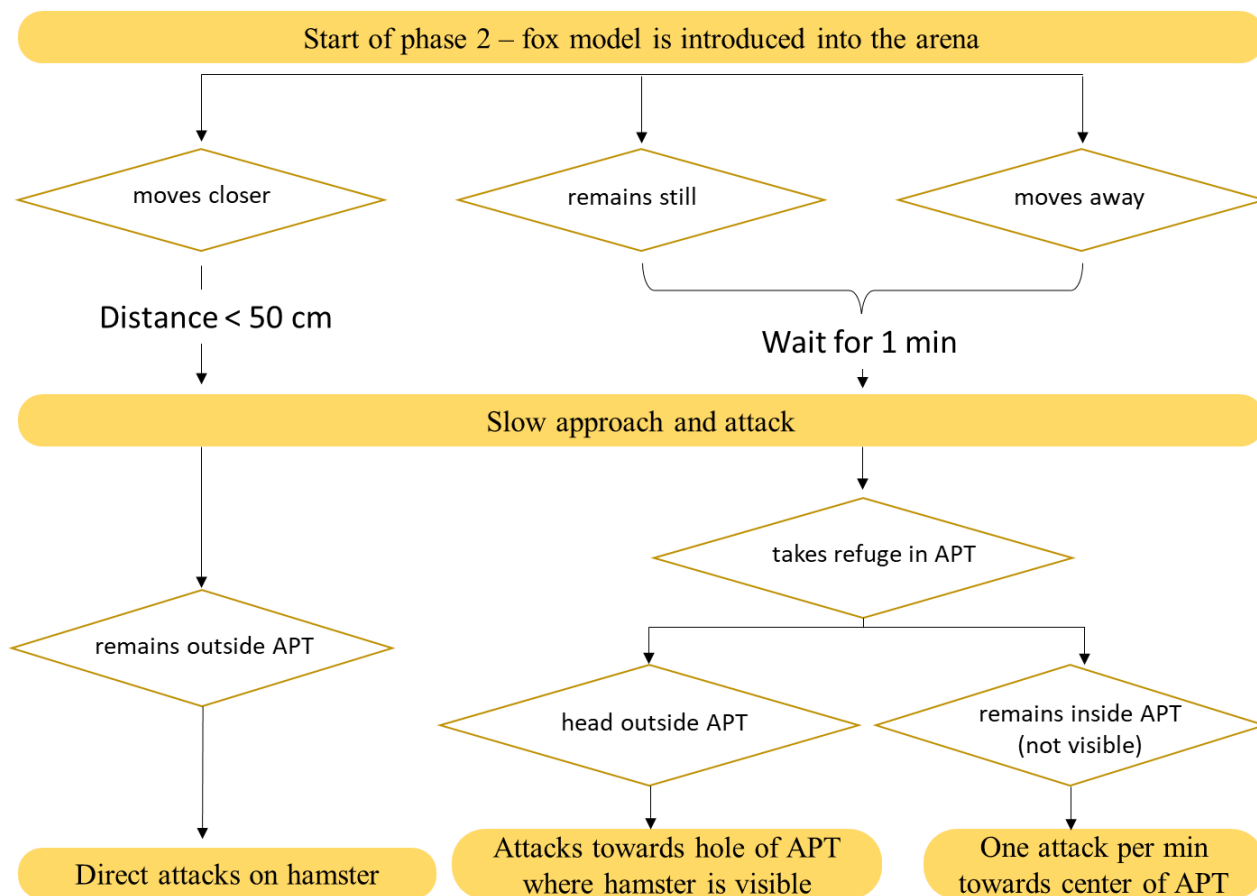

Supplement: FigureS1.pdf [file FigureS1.pdf]
